# Supplementary material for: Assessment of Genetic Diversity, Population Structure, and Evolutionary Relationship of Uncharacterized Genes in a Novel Germplasm Collection of Diploid and Allotetraploid Gossypium Accessions Using EST and Genomic SSR Markers
Source: MDPI journal article supplement (doi:10.3390/ijms19082401), 2018-08-14
Supplement: s1 [file s1]

**Supplementary Table S1: Genotype name, pedigree and origin of selected genotypes**

| Sr. No. | Genotype             | Accession No.   | Origin                                 | Sr. No. | Genotype                | Accession No.      | Origin                                 |
|---------|----------------------|-----------------|----------------------------------------|---------|-------------------------|--------------------|----------------------------------------|
| 1       | <i>G. barbadense</i> | 3-79-2          | Wild cotton germplasm nursery of China | 67      | <i>G. darwinii</i>      | AD5-60             | San Cristobal, Galapagos islands       |
| 2       | <i>G. barbadense</i> | 3-79-3          | Wild cotton germplasm nursery of China | 68      | <i>G. darwinii</i>      | AD5-61-1           | San Cristobal, Galapagos islands       |
| 3       | <i>G. barbadense</i> | AD2-1-1 GLPS    | SantaCruz,Galapagos islands            | 69      | <i>G. darwinii</i>      | AD5-61-2           | San Cristobal, Galapagos islands       |
| 4       | <i>G. barbadense</i> | AD2-1-2 GLPS    | SantaCruz,Galapagos islands            | 70      | <i>G. darwinii</i>      | AD5-61-3           | San Cristobal, Galapagos islands       |
| 5       | <i>G. barbadense</i> | AD2-1-3 GLPS    | SantaCruz,Galapagos islands            | 71      | <i>G. darwinii</i>      | AD5-61-4           | San Cristobal, Galapagos islands       |
| 6       | <i>G. barbadense</i> | AD2-1-4 GLPS    | SantaCruz,Galapagos islands            | 72      | <i>G. darwinii</i>      | AD5-61-5           | San Cristobal, Galapagos islands       |
| 7       | <i>G. barbadense</i> | AD2-1-5 GLPS    | SantaCruz,Galapagos islands            | 73      | <i>G. darwinii</i>      | AD5-61-6           | San Cristobal, Galapagos islands       |
| 8       | <i>G. barbadense</i> | AD2-6           | Santa Cruz, Galapagos islands          | 74      | <i>G. darwinii</i>      | AD5-61-7           | San Cristobal, Galapagos islands       |
| 9       | <i>G. barbadense</i> | AD2-2 GLPS      | SantaCruz,Galapagos islands            | 75      | <i>G. darwinii</i>      | AD5-61-8           | San Cristobal, Galapagos islands       |
| 10      | <i>G. barbadense</i> | AD2-3-1 GLPS    | SantaCruz,Galapagos islands            | 76      | <i>G. darwinii</i>      | AD5-61-9           | San Cristobal, Galapagos islands       |
| 11      | <i>G. barbadense</i> | AD2-3-2 GLPS    | Santa Cruz, Galapagos islands          | 77      | <i>G. darwinii</i>      | AD5-61-10          | San Cristobal, Galapagos islands       |
| 12      | <i>G. barbadense</i> | AD2-4-1 GLPS    | Santa Cruz, Galapagos islands          | 78      | <i>G. darwinii</i>      | Subsp.darwini II-1 | Wild cotton germplasm nursery of China |
| 13      | <i>G. barbadense</i> | AD2-4-2 GLPS    | Santa Cruz, Galapagos islands          | 79      | <i>G. darwinii</i>      | Subsp.darwini II-2 | Wild cotton germplasm nursery of China |
| 14      | <i>G. barbadense</i> | AD2-5-1 GLPS    | Santa Cruz, Galapagos islands          | 80      | <i>G. klotzschianum</i> | D3-k-lz            | Wild cotton germplasm nursery of China |
| 15      | <i>G. barbadense</i> | AD2-5-2 GLPS    | Santa Cruz, Galapagos islands          | 81      | <i>G. klotzschianum</i> | D3k-21-1           | Santa Cruz, Galapagos islands          |
| 16      | <i>G. barbadense</i> | AD2-5-3 GLPS    | Santa Cruz, Galapagos islands          | 82      | <i>G. klotzschianum</i> | D3k-21-2           | Santa Cruz, Galapagos islands          |
| 17      | <i>G. barbadense</i> | AD2-5-4 GLPS    | Santa Cruz, Galapagos islands          | 83      | <i>G. klotzschianum</i> | D3k-21-3           | Santa Cruz, Galapagos islands          |
| 18      | <i>G. barbadense</i> | XH-18           | Wild cotton germplasm nursery of China | 84      | <i>G. klotzschianum</i> | D3k-21-4           | Santa Cruz, Galapagos islands          |
| 19      | <i>G. barbadense</i> | XH-21           | Wild cotton germplasm nursery of China | 85      | <i>G. hirsutum</i>      | CCRI12             | Wild cotton germplasm nursery of China |
| 20      | <i>G. barbadense</i> | Sibruk Egyptian | Wild cotton germplasm nursery of China | 86      | <i>G. hirsutum</i>      | CCRI16             | Wild cotton germplasm nursery of China |
| 21      | <i>G. darwinii</i>   | AD5-lz          | Wild cotton germplasm nursery of China | 87      | <i>G. tomentosum</i>    | AD3-27             | Hawaiian Islands                       |
| 22      | <i>G. darwinii</i>   | AD5-3           | Wild cotton germplasm nursery of China | 88      | <i>G. tomentosum</i>    | AD3-28-1           | Hawaiian Islands                       |
| 23      | <i>G. darwinii</i>   | AD5-7           | Wild cotton germplasm nursery of China | 89      | <i>G. tomentosum</i>    | AD3-28-2           | Hawaiian Islands                       |
| 24      | <i>G. darwinii</i>   | AD5-25-1        | SantaCruz,Galapagos islands            | 90      | <i>G. tomentosum</i>    | AD3-30-1           | Hawaiian Islands                       |
| 25      | <i>G. darwinii</i>   | AD5-26-1        | Isabela, Galapagos islands             | 91      | <i>G. tomentosum</i>    | AD3-30-2           | Hawaiian Islands                       |
| 26      | <i>G. darwinii</i>   | AD5-26-2        | Isabela, Galapagos islands             | 92      | <i>G. tomentosum</i>    | AD3-lz             | Hawaiian Islands                       |
| 27      | <i>G. darwinii</i>   | AD5-28-1        | Isabela, Galapagos islands             | 93      | <i>G. tomentosum</i>    | AD3-70             | Hawaiian Islands                       |
| 28      | <i>G. darwinii</i>   | AD5-28-2        | Isabela, Galapagos islands             | 94      | <i>G. tomentosum</i>    | AD3-71             | Hawaiian Islands                       |
| 29      | <i>G. darwinii</i>   | AD5-28-3        | Isabela, Galapagos islands             | 95      | <i>G. tomentosum</i>    | AD3-72             | Hawaiian Islands                       |
| 30      | <i>G. darwinii</i>   | AD5-28-4        | Isabela, Galapagos islands             | 96      | <i>G. tomentosum</i>    | AD3-73             | Hawaiian Islands                       |
| 31      | <i>G. darwinii</i>   | AD5-29-1        | Isabela, Galapagos islands             | 97      | <i>G. tomentosum</i>    | AD3-68             | Hawaiian Islands                       |
| 32      | <i>G. darwinii</i>   | AD5-29-2        | Isabela, Galapagos islands             | 98      | <i>G. tomentosum</i>    | AD3-69             | Hawaiian Islands                       |
| 33      | <i>G. darwinii</i>   | AD5-30-1        | Isabela, Galapagos islands             | 99      | <i>G. tomentosum</i>    | AD3-21             | Oahu, Hawaiian Islands                 |
| 34      | <i>G. darwinii</i>   | AD5-30-2        | Isabela, Galapagos islands             | 100     | <i>G. tomentosum</i>    | AD3-23             | Oahu, Hawaiian Islands                 |
| 35      | <i>G. darwinii</i>   | AD5-30-3        | Isabela, Galapagos islands             | 101     | <i>G. tomentosum</i>    | AD3-24             | Oahu, Hawaiian Islands                 |
| 36      | <i>G. darwinii</i>   | AD5-30-4        | Isabela, Galapagos islands             | 102     | <i>G. tomentosum</i>    | AD3-25             | Oahu, Hawaiian Islands                 |
| 37      | <i>G. darwinii</i>   | AD5-31-1        | Isabela, Galapagos islands             | 103     | <i>G. tomentosum</i>    | AD3-26             | Oahu, Hawaiian Islands                 |
| 38      | <i>G. darwinii</i>   | AD5-31-2        | Isabela, Galapagos islands             | 104     | <i>G. tomentosum</i>    | AD3-32             | Lanai , Hawaiian Islands               |
| 39      | <i>G. darwinii</i>   | AD5-31-3        | Isabela, Galapagos islands             | 105     | <i>G. tomentosum</i>    | AD3-33             | Oahu, Hawaiian Islands                 |
| 40      | <i>G. darwinii</i>   | AD5-43          | Isabela, Galapagos islands             | 106     | <i>G. tomentosum</i>    | AD3-35             | Big island, Hawaiian Islands           |
| 41      | <i>G. darwinii</i>   | AD5-48          | Isabela, Galapagos islands             | 107     | <i>G. tomentosum</i>    | AD3-36             | Big island, Hawaiian Islands           |
| 42      | <i>G. darwinii</i>   | AD5-50          | Isabela, Galapagos islands             | 108     | <i>G. tomentosum</i>    | AD3-37             | Lanai , Hawaiian Islands               |
| 43      | <i>G. darwinii</i>   | AD5-51          | Isabela, Galapagos islands             | 109     | <i>G. tomentosum</i>    | AD3-38             | Lanai , Hawaiian Islands               |
| 44      | <i>G. darwinii</i>   | AD5-52          | Isabela, Galapagos islands             | 110     | <i>G. tomentosum</i>    | AD3-39             | Lanai , Hawaiian Islands               |
| 45      | <i>G. darwinii</i>   | AD5-53          | Isabela, Galapagos islands             | 111     | <i>G. tomentosum</i>    | AD3-40             | Lanai , Hawaiian Islands               |
| 46      | <i>G. darwinii</i>   | AD5-54-1        | Isabela, Galapagos islands             | 112     | <i>G. tomentosum</i>    | AD3-41             | Lanai , Hawaiian Islands               |
| 47      | <i>G. darwinii</i>   | AD5-54-2        | Isabela, Galapagos islands             | 113     | <i>G. tomentosum</i>    | AD3-42             | Lanai , Hawaiian Islands               |
| 48      | <i>G. darwinii</i>   | AD5-55          | Isabela, Galapagos islands             | 114     | <i>G. tomentosum</i>    | AD3-45             | Molokai , Hawaiian Island              |
| 49      | <i>G. darwinii</i>   | AD5-22          | SantaCruz,Galapagos islands            | 115     | <i>G. tomentosum</i>    | AD3-46             | Molokai , Hawaiian Island              |
| 50      | <i>G. darwinii</i>   | AD5-24          | SantaCruz,Galapagos islands            | 116     | <i>G. tomentosum</i>    | AD3-47             | Molokai , Hawaiian Island              |
| 51      | <i>G. darwinii</i>   | AD5-25-2        | SantaCruz,Galapagos islands            | 117     | <i>G. tomentosum</i>    | AD3-49             | Molokai , Hawaiian Island              |
| 52      | <i>G. darwinii</i>   | AD5-32-1        | SantaCruz,Galapagos islands            | 118     | <i>G. tomentosum</i>    | AD3-50             | Oahu, Hawaiian Islands                 |
| 53      | <i>G. darwinii</i>   | AD5-32-2        | SantaCruz,Galapagos islands            | 119     | <i>G. ekmanianum</i>    | AD6-01-1           | Dominican Republic, US NPGS            |
| 54      | <i>G. darwinii</i>   | AD5-33          | SantaCruz,Galapagos islands            | 120     | <i>G. ekmanianum</i>    | AD6-01-2           | Dominican Republic, US NPGS            |
| 55      | <i>G. darwinii</i>   | AD5-34-1        | SantaCruz,Galapagos islands            | 121     | <i>G. ekmanianum</i>    | AD6-01-3           | Dominican Republic, US NPGS            |
| 56      | <i>G. darwinii</i>   | AD5-34-2        | SantaCruz,Galapagos islands            | 122     | <i>G. ekmanianum</i>    | AD6-02-4           | Dominican Republic, US NPGS            |
| 57      | <i>G. darwinii</i>   | AD5-34-3        | SantaCruz,Galapagos islands            | 123     | <i>G. ekmanianum</i>    | AD6-03-7           | Dominican Republic, US NPGS            |
| 58      | <i>G. darwinii</i>   | AD5-34-4        | SantaCruz,Galapagos islands            | 124     | <i>G. ekmanianum</i>    | AD6-03-8           | Dominican Republic, US NPGS            |
| 59      | <i>G. darwinii</i>   | AD5-34-5        | SantaCruz,Galapagos islands            | 125     | <i>G. ekmanianum</i>    | AD6-03-9           | Dominican Republic, US NPGS            |
| 60      | <i>G. darwinii</i>   | AD5-35-1        | SantaCruz,Galapagos islands            | 126     | <i>G. ekmanianum</i>    | AD6-03-10          | Dominican Republic, US NPGS            |
| 61      | <i>G. darwinii</i>   | AD5-35-2        | SantaCruz,Galapagos islands            | 127     | <i>G. ekmanianum</i>    | AD6-03-11          | Dominican Republic, US NPGS            |
| 62      | <i>G. darwinii</i>   | AD5-56          | San Cristobal, Galapagos islands       | 128     | <i>G. ekmanianum</i>    | AD6-03-12          | Dominican Republic, US NPGS            |
| 63      | <i>G. darwinii</i>   | AD5-57          | San Cristobal, Galapagos islands       | 129     | <i>G. stephensii</i>    | AD7-01-13          | Wake Atoll, US NPGS                    |
| 64      | <i>G. darwinii</i>   | AD5-58          | San Cristobal, Galapagos islands       | 130     | <i>G. stephensii</i>    | AD7-01-14          | Wake Atoll, US NPGS                    |
| 65      | <i>G. darwinii</i>   | AD5-59-1        | San Cristobal, Galapagos islands       | 131     | <i>G. stephansii</i>    | AD7-01-15          | Wake Atoll, US NPGS                    |
| 66      | <i>G. darwinii</i>   | AD5-59-2        | San Cristobal, Galapagos islands       | 132     | <i>G. stephansii</i>    | AD7-01-16          | Wake Atoll, US NPGS                    |
