# Supplementary material for: Assessment of Genetic Diversity, Population Structure, and Evolutionary Relationship of Uncharacterized Genes in a Novel Germplasm Collection of Diploid and Allotetraploid Gossypium Accessions Using EST and Genomic SSR Markers
Source: MDPI journal article supplement (doi:10.3390/ijms19082401), 2018-08-14
Supplement: s1 [file s1]

Supplementary Table S3: List of unique alleles found in allotetraploid accessions.

| Sr.No. | Accession Name     | Species Name            | Unique Alleles |
|--------|--------------------|-------------------------|----------------|
| 1      | CCRI12             | <i>G. hirsutum</i>      | 15             |
| 2      | CCRI16             | <i>G. hirsutum</i>      | 10             |
| 3      | AD2-1 GLPS         | <i>G. barbadense</i>    | 1              |
| 4      | AD2-2 GLPS         | <i>G. barbadense</i>    | 4              |
| 5      | AD2-5 GLPS         | <i>G. barbadense</i>    | 2              |
| 6      | AD2-6              | <i>G. barbadense</i>    | 4              |
| 7      | 3-79-2             | <i>G. barbadense</i>    | 1              |
| 8      | XH21               | <i>G. barbadense</i>    | 6              |
| 9      | Sibruk Egyptian    | <i>G. barbadense</i>    | 1              |
| 10     | AD3-27             | <i>G. tomentosum</i>    | 4              |
| 11     | AD3-28-1           | <i>G. tomentosum</i>    | 1              |
| 12     | AD3-28-2           | <i>G. tomentosum</i>    | 1              |
| 13     | AD3-40             | <i>G. tomentosum</i>    | 1              |
| 14     | AD3-47             | <i>G. tomentosum</i>    | 1              |
| 15     | AD3-49             | <i>G. tomentosum</i>    | 2              |
| 16     | AD3-50             | <i>G. tomentosum</i>    | 1              |
| 17     | AD3-69             | <i>G. tomentosum</i>    | 2              |
| 18     | AD5-22             | <i>G. darwinii</i>      | 1              |
| 19     | AD5-34             | <i>G. darwinii</i>      | 1              |
| 20     | AD5-43             | <i>G. darwinii</i>      | 1              |
| 21     | AD5-48             | <i>G. darwinii</i>      | 2              |
| 22     | AD5-54             | <i>G. darwinii</i>      | 1              |
| 23     | AD5-56             | <i>G. darwinii</i>      | 2              |
| 24     | AD5-57             | <i>G. darwinii</i>      | 1              |
| 25     | AD5-60             | <i>G. darwinii</i>      | 1              |
| 26     | AD5-61-9           | <i>G. darwinii</i>      | 2              |
| 27     | AD5-7              | <i>G. darwinii</i>      | 2              |
| 28     | AD5-3              | <i>G. darwinii</i>      | 2              |
| 29     | Subsp darwiniiII-2 | <i>G. darwinii</i>      | 2              |
| 30     | AD6-02-4           | <i>G. ekmanianum</i>    | 5              |
| 31     | AD6-03-10          | <i>G. ekmanianum</i>    | 2              |
| 32     | AD6-03-12          | <i>G. ekmanianum</i>    | 24             |
| 33     | AD7-01-13          | <i>G. stephensii</i>    | 1              |
| 34     | AD7-01-14          | <i>G. stephensii</i>    | 1              |
| 35     | AD7-01-15          | <i>G. stephensii</i>    | 2              |
| 36     | D3-k-lz            | <i>G. klotzschianum</i> | 6              |
| 37     | D3-k-21-1          | <i>G. klotzschianum</i> | 2              |
| 38     | D3-k-21-4          | <i>G. klotzschianum</i> | 5              |
|        | Total              |                         | 123            |
