# Supplementary material for: Assessment of Genetic Diversity, Population Structure, and Evolutionary Relationship of Uncharacterized Genes in a Novel Germplasm Collection of Diploid and Allotetraploid Gossypium Accessions Using EST and Genomic SSR Markers
Source: MDPI journal article supplement (doi:10.3390/ijms19082401), 2018-08-14
Supplement: s1 [file s1]

Supplementary Table S5: Estimation of common alleles distributed among all six *Gossypium* species with reference to *G. hirsutum*.

| Marker name | <i>G.bar</i><br>(AD2) | <i>G.darwinii</i><br>(AD5) | <i>G.tom</i><br>(AD3) | <i>G.ekma</i><br>(AD6) | <i>G.steph</i><br>(AD7) | <i>G.klotz</i><br>(D3) | Common Alleles |
|-------------|-----------------------|----------------------------|-----------------------|------------------------|-------------------------|------------------------|----------------|
| DPL0068-B   | 18                    | 10                         | 20                    | 0                      | 0                       | 0                      | 48             |
| DPL0068-E   | 5                     | 5                          | 10                    | 0                      | 0                       | 0                      | 20             |
| DPL0068-F   | 19                    | 16                         | 11                    | 0                      | 0                       | 0                      | 46             |
| DPL0069-C   | 0                     | 0                          | 0                     | 10                     | 0                       | 0                      | 10             |
| DPL0071-A   | 9                     | 17                         | 32                    | 10                     | 4                       | 0                      | 72             |
| DPL0071-B   | 14                    | 33                         | 0                     | 0                      | 0                       | 0                      | 47             |
| DPL0094-A   | 20                    | 58                         | 30                    | 10                     | 4                       | 0                      | 122            |
| DPL0169-A   | 20                    | 0                          | 29                    | 0                      | 4                       | 5                      | 58             |
| DPL0249-C   | 1                     | 0                          | 0                     | 0                      | 0                       | 2                      | 3              |
| DPL0262-C   | 20                    | 45                         | 31                    | 0                      | 0                       | 0                      | 96             |
| DPL0278-A   | 20                    | 49                         | 21                    | 6                      | 4                       | 5                      | 105            |
| DPL0278-C   | 18                    | 39                         | 23                    | 4                      | 4                       | 0                      | 88             |
| DPL0300-A   | 20                    | 59                         | 32                    | 9                      | 4                       | 0                      | 124            |
| DPL0300-B   | 0                     | 2                          | 1                     | 10                     | 0                       | 5                      | 18             |
| DPL0307-B   | 19                    | 51                         | 32                    | 10                     | 4                       | 0                      | 116            |
| DPL0309-A   | 9                     | 41                         | 0                     | 10                     | 0                       | 0                      | 60             |
| DPL0309-B   | 14                    | 46                         | 0                     | 1                      | 4                       | 0                      | 65             |
| DPL0317-B   | 8                     | 56                         | 0                     | 9                      | 4                       | 0                      | 77             |
| DPL0317-C   | 1                     | 3                          | 0                     | 10                     | 4                       | 3                      | 21             |
| DPL0325-C   | 0                     | 1                          | 0                     | 4                      | 4                       | 0                      | 9              |
| DPL0328-B   | 19                    | 56                         | 32                    | 10                     | 4                       | 0                      | 121            |
| DPL0328-C   | 0                     | 0                          | 0                     | 10                     | 0                       | 0                      | 10             |
| DPL0348-A   | 20                    | 32                         | 32                    | 7                      | 1                       | 1                      | 93             |
| DPL0348-B   | 0                     | 38                         | 2                     | 2                      | 3                       | 5                      | 50             |
| DPL0368-C   | 0                     | 2                          | 0                     | 0                      | 0                       | 5                      | 7              |
| DPL0385-D   | 3                     | 13                         | 1                     | 1                      | 0                       | 0                      | 18             |
| DPL0385-F   | 0                     | 0                          | 0                     | 4                      | 4                       | 0                      | 8              |
| DPL0389-B   | 17                    | 52                         | 32                    | 10                     | 4                       | 0                      | 115            |
| DPL0389-D   | 1                     | 20                         | 0                     | 10                     | 0                       | 5                      | 36             |
| DPL0417-A   | 20                    | 55                         | 32                    | 10                     | 4                       | 0                      | 121            |
| DPL0417-C   | 3                     | 25                         | 31                    | 0                      | 0                       | 5                      | 64             |
| DPL0444-B   | 1                     | 24                         | 32                    | 3                      | 4                       | 5                      | 69             |
| DPL0489-C   | 0                     | 15                         | 30                    | 0                      | 0                       | 0                      | 45             |
| DPL0501-B   | 17                    | 26                         | 0                     | 4                      | 0                       | 0                      | 47             |
| DPL0501-C   | 17                    | 15                         | 32                    | 6                      | 4                       | 5                      | 79             |
| DPL0608-A   | 20                    | 42                         | 32                    | 10                     | 4                       | 0                      | 108            |
| DPL0608-E   | 0                     | 0                          | 29                    | 6                      | 0                       | 0                      | 35             |
| DPL0622-A   | 3                     | 20                         | 17                    | 1                      | 0                       | 4                      | 45             |

|              |    |    |    |    |   |   |     |
|--------------|----|----|----|----|---|---|-----|
| DPL0631-B    | 0  | 20 | 1  | 10 | 4 | 1 | 36  |
| DPL0631-C    | 0  | 22 | 12 | 0  | 0 | 4 | 38  |
| DPL0635-A    | 3  | 6  | 32 | 10 | 4 | 0 | 55  |
| DPL0638-C    | 0  | 0  | 0  | 10 | 0 | 0 | 10  |
| DPL0651-B    | 20 | 43 | 32 | 10 | 4 | 0 | 109 |
| DPL0707-B    | 0  | 33 | 20 | 1  | 0 | 0 | 54  |
| DPL0727-C    | 0  | 0  | 0  | 5  | 4 | 0 | 9   |
| DPL0732-A    | 20 | 47 | 27 | 8  | 0 | 2 | 104 |
| DPL0732-C    | 17 | 1  | 0  | 10 | 4 | 0 | 32  |
| DPL0807-B    | 0  | 0  | 0  | 9  | 0 | 0 | 9   |
| DPL0852-A    | 17 | 55 | 22 | 10 | 4 | 0 | 108 |
| MonCGR6280-A | 19 | 55 | 32 | 10 | 4 | 0 | 120 |
| MonCGR6294-A | 20 | 47 | 1  | 4  | 4 | 0 | 76  |
| MonCGR6382-B | 0  | 0  | 31 | 10 | 4 | 0 | 45  |
| MonCGR6407-C | 4  | 21 | 32 | 6  | 4 | 0 | 67  |
| MonCGR6512-A | 0  | 0  | 3  | 10 | 4 | 5 | 22  |
| MonCGR6512-B | 19 | 36 | 28 | 1  | 4 | 0 | 88  |
| MUCS0064-C   | 0  | 8  | 18 | 0  | 0 | 0 | 26  |
| NAU1028-B    | 1  | 51 | 32 | 10 | 4 | 0 | 98  |
| NAU1028-C    | 1  | 26 | 30 | 1  | 4 | 0 | 62  |
| NAU1052-A    | 20 | 47 | 6  | 4  | 0 | 0 | 77  |
| SWU10037-A   | 16 | 42 | 32 | 9  | 4 | 5 | 108 |
| SWU10037-B   | 6  | 33 | 1  | 10 | 0 | 0 | 50  |
| SWU10072-B   | 17 | 34 | 32 | 6  | 4 | 5 | 98  |
| SWU10116-A   | 16 | 9  | 31 | 10 | 4 | 0 | 70  |
| SWU10116-C   | 16 | 7  | 32 | 9  | 4 | 0 | 68  |
| SWU10326-A   | 20 | 53 | 31 | 10 | 4 | 5 | 123 |
| SWU10326-B   | 3  | 19 | 5  | 10 | 0 | 0 | 37  |
| SWU10663-C   | 17 | 20 | 4  | 8  | 4 | 0 | 53  |
| SWU10664-A   | 1  | 24 | 29 | 6  | 4 | 0 | 64  |
| SWU10722-C   | 2  | 28 | 8  | 3  | 4 | 3 | 48  |
| SWU10741-C   | 0  | 13 | 0  | 10 | 0 | 0 | 23  |
| SWU10746-A   | 19 | 33 | 31 | 9  | 4 | 0 | 96  |
| SWU10746-B   | 18 | 30 | 31 | 2  | 4 | 5 | 90  |
| SWU10755-A   | 17 | 55 | 0  | 10 | 4 | 0 | 86  |
| SWU10828-B   | 2  | 11 | 32 | 10 | 4 | 0 | 59  |
| SWU10828-C   | 3  | 33 | 0  | 9  | 0 | 0 | 45  |
| SWU10892-C   | 0  | 0  | 0  | 1  | 4 | 0 | 5   |
| SWU10931-A   | 18 | 54 | 32 | 1  | 4 | 0 | 109 |
| SWU10931-B   | 18 | 36 | 31 | 10 | 4 | 0 | 99  |
| SWU11097-A   | 16 | 38 | 32 | 10 | 4 | 0 | 100 |
| SWU11112-B   | 0  | 10 | 21 | 8  | 4 | 0 | 43  |
| SWU11112-C   | 19 | 39 | 30 | 9  | 4 | 3 | 104 |
| SWU11115-A   | 18 | 24 | 3  | 10 | 0 | 0 | 55  |

|             |           |            |           |           |           |           |     |
|-------------|-----------|------------|-----------|-----------|-----------|-----------|-----|
| SWU11731-C  | 7         | 53         | 6         | 0         | 4         | 1         | 71  |
| SWU12187-B  | 20        | 3          | 31        | 7         | 0         | 0         | 61  |
| SWU12228-B  | 19        | 0          | 10        | 0         | 0         | 5         | 34  |
| SWU12248-A  | 0         | 25         | 0         | 0         | 4         | 3         | 32  |
| SWU12248-B  | 0         | 12         | 19        | 0         | 0         | 4         | 35  |
| SWU12430-B  | 0         | 51         | 3         | 7         | 4         | 0         | 65  |
| SWU12430-C  | 20        | 7          | 8         | 0         | 0         | 0         | 35  |
| SWU12746-B  | 14        | 46         | 10        | 5         | 0         | 0         | 75  |
| SWU13423-B  | 19        | 32         | 22        | 4         | 4         | 0         | 81  |
| SWU13534-B  | 20        | 23         | 32        | 10        | 4         | 5         | 94  |
| SWU13551-A  | 19        | 9          | 31        | 5         | 4         | 0         | 68  |
| SWU13551-B  | 3         | 50         | 0         | 1         | 0         | 5         | 59  |
| SWU13677-C  | 0         | 19         | 0         | 9         | 0         | 0         | 28  |
| SWU13895-B  | 14        | 29         | 0         | 0         | 0         | 0         | 43  |
| SWU14461-A  | 20        | 24         | 12        | 1         | 4         | 0         | 61  |
| SWU14590-A  | 2         | 56         | 32        | 10        | 0         | 0         | 100 |
| SWU14590-C  | 2         | 54         | 32        | 10        | 0         | 0         | 98  |
| SWU14654-C  | 10        | 25         | 0         | 5         | 4         | 0         | 44  |
| SWU14702-A  | 10        | 30         | 32        | 10        | 4         | 0         | 86  |
| SWU14818-B  | 2         | 1          | 1         | 1         | 0         | 0         | 5   |
| SWU14961-C  | 4         | 18         | 0         | 10        | 4         | 0         | 36  |
| SWU15000-A  | 12        | 49         | 32        | 10        | 4         | 0         | 107 |
| SWU15194-G  | 7         | 18         | 0         | 0         | 4         | 1         | 30  |
| SWU15212-B  | 20        | 54         | 32        | 1         | 0         | 0         | 107 |
| SWU15642-E  | 5         | 13         | 0         | 0         | 4         | 0         | 22  |
| SWU16373-D  | 12        | 30         | 0         | 0         | 4         | 0         | 46  |
| SWU16441-C  | 0         | 5          | 15        | 0         | 0         | 0         | 20  |
| SWU16671-D  | 4         | 2          | 0         | 0         | 0         | 0         | 6   |
| SWU16802-B  | 6         | 9          | 0         | 1         | 0         | 0         | 16  |
| SWU18252-B  | 20        | 56         | 31        | 10        | 0         | 0         | 117 |
| SWU18262-E  | 1         | 11         | 2         | 3         | 0         | 0         | 17  |
| SWU18289-B  | 7         | 2          | 32        | 10        | 4         | 0         | 55  |
| Common Loci | <b>88</b> | <b>101</b> | <b>82</b> | <b>91</b> | <b>67</b> | <b>30</b> |     |
