# Supplementary material for: Assessment of Genetic Diversity, Population Structure, and Evolutionary Relationship of Uncharacterized Genes in a Novel Germplasm Collection of Diploid and Allotetraploid Gossypium Accessions Using EST and Genomic SSR Markers
Source: MDPI journal article supplement (doi:10.3390/ijms19082401), 2018-08-14
Supplement: s1 [file s1]

Supplementary Table S2: SSR markers with repeat type, Number of Polymorphic alleles, Total alleles, major allele frequency (MAF), No. of obs. and polymorphism information content (PIC) estimated by 111 simple sequence repeat markers in 132 diploid and allotetraploid *Gossypium* accessions.

| Marker  | Repeat Type                                                                             | Poly Alleles | Total bands | MAF   | No. of obs. | PIC   |
|---------|-----------------------------------------------------------------------------------------|--------------|-------------|-------|-------------|-------|
| DPL0064 |                                                                                         | 3            | 54          | 0.863 | 131         | 0.547 |
| DPL0068 | (AG)27(GGGA)2                                                                           | 6            | 228         | 0.710 | 131         | 0.808 |
| DPL0069 | (AG)27                                                                                  | 3            | 131         | 0.776 | 131         | 0.491 |
| DPL0071 | (AG)32                                                                                  | 3            | 161         | 0.634 | 131         | 0.640 |
| DPL0094 | (AG)29                                                                                  | 3            | 191         | 0.812 | 131         | 0.508 |
| DPL0169 | (TC)14                                                                                  | 3            | 198         | 0.545 | 131         | 0.663 |
| DPL0249 | (TCA)8                                                                                  | 7            | 247         | 0.828 | 132         | 0.713 |
| DPL0262 | (ATG)13                                                                                 | 4            | 106         | 0.929 | 126         | 0.143 |
| DPL0278 | (CAT)8                                                                                  | 5            | 304         | 0.779 | 128         | 0.721 |
| DPL0279 | (TCA)8 (CCA)4                                                                           | 3            | 138         | 0.697 | 132         | 0.568 |
| DPL0300 | (ATC)10                                                                                 | 6            | 265         | 0.817 | 132         | 0.676 |
| DPL0307 | (GAT)7                                                                                  | 2            | 228         | 0.898 | 127         | 0.499 |
| DPL0309 | (GAT)7                                                                                  | 2            | 129         | 0.542 | 119         | 0.499 |
| DPL0317 | (TCTTCA)4(TCA)6(ADAAC)2                                                                 | 4            | 185         | 0.697 | 127         | 0.694 |
| DPL0325 | (TTC)14(ATC)11                                                                          | 3            | 112         | 0.861 | 127         | 0.296 |
| DPL0328 | (CAT)8                                                                                  | 3            | 171         | 0.864 | 127         | 0.433 |
| DPL0338 | (CAT)8                                                                                  | 3            | 136         | 0.682 | 127         | 0.525 |
| DPL0342 | (ATC)10                                                                                 | 3            | 161         | 0.697 | 131         | 0.549 |
| DPL0348 | (GCT)8                                                                                  | 2            | 147         | 0.674 | 132         | 0.457 |
| DPL0368 | (CAG)6(CAG)4(GCA)2(CAA)2(CAT)2(CAG)2(TTGCAG)3(CAG)3(CAA)4(GCA)4(GCA)2(ACA)2(GCA)5(CAG)7 | 5            | 223         | 0.777 | 132         | 0.683 |
| DPL0378 | (TAG)14                                                                                 | 6            | 220         | 0.808 | 132         | 0.686 |
| DPL0385 | (TAG)9                                                                                  | 6            | 179         | 0.870 | 132         | 0.612 |
| DPL0389 | (AGT)15(AAT)5(AAC)4                                                                     | 4            | 263         | 0.714 | 132         | 0.681 |
| DPL0395 | (TTA)13                                                                                 | 6            | 240         | 0.710 | 132         | 0.794 |
| DPL0417 | (TAA)19                                                                                 | 3            | 246         | 0.667 | 132         | 0.624 |
| DPL0442 | (ATT)12                                                                                 | 4            | 126         | 0.759 | 131         | 0.747 |
| DPL0444 | (AAT)10                                                                                 | 3            | 140         | 0.672 | 132         | 0.538 |
| DPL0489 | (ATAC)10                                                                                | 5            | 152         | 0.764 | 129         | 0.750 |
| DPL0490 | (ATGT)9                                                                                 | 2            | 118         | 0.759 | 129         | 0.344 |
| DPL0501 | (TATG)11                                                                                | 8            | 334         | 0.748 | 126         | 0.821 |
| DPL0513 | (GTAT)21                                                                                | 4            | 109         | 0.789 | 123         | 0.597 |
| DPL0608 | (AAAAAG)2(GA)3(AG)20                                                                    | 5            | 231         | 0.782 | 125         | 0.695 |
| DPL0622 |                                                                                         | 2            | 130         | 0.641 | 128         | 0.462 |
| DPL0631 | (TCT)8                                                                                  | 3            | 182         | 0.734 | 129         | 0.582 |
| DPL0635 | (CTT)23                                                                                 | 2            | 77          | 0.703 | 130         | 0.385 |
| DPL0638 |                                                                                         | 3            | 130         | 0.724 | 129         | 0.545 |
| DPL0639 |                                                                                         | 3            | 182         | 0.584 | 125         | 0.653 |
| DPL0651 |                                                                                         | 2            | 155         | 0.760 | 129         | 0.407 |
| DPL0679 | (AGA)6                                                                                  | 2            | 97          | 0.622 | 129         | 0.449 |

|            |                               |   |     |       |     |       |
|------------|-------------------------------|---|-----|-------|-----|-------|
| DPL0707    |                               | 4 | 182 | 0.631 | 124 | 0.734 |
| DPL0715    | (TTG)7                        | 3 | 147 | 0.886 | 129 | 0.343 |
| DPL0727    |                               | 4 | 116 | 0.862 | 129 | 0.407 |
| DPL0732    |                               | 4 | 199 | 0.775 | 129 | 0.620 |
| DPL0788    |                               | 3 | 179 | 0.544 | 129 | 0.661 |
| DPL0807    | (TCA)6(ATC)3(TCA)2(TCG)9      | 7 | 208 | 0.793 | 130 | 0.743 |
| DPL0810    | (TATC)11(TATC)4(CATC)5(TATC)2 | 4 | 171 | 0.666 | 128 | 0.725 |
| DPL0852    |                               | 2 | 163 | 0.721 | 129 | 0.439 |
| MonCGR6280 |                               | 3 | 170 | 0.855 | 131 | 0.445 |
| MonCGR6294 |                               | 2 | 106 | 0.703 | 125 | 0.389 |
| MonCGR6382 |                               | 2 | 166 | 0.779 | 129 | 0.406 |
| MonCGR6407 |                               | 3 | 133 | 0.680 | 129 | 0.533 |
| MonCGR6512 |                               | 2 | 114 | 0.762 | 126 | 0.332 |
| MonCGR6517 |                               | 2 | 68  | 0.780 | 93  | 0.208 |
| MUCS0064   | (CAG)4(GAG)6                  | 4 | 229 | 0.781 | 129 | 0.633 |
| NAU1028    | (AATT)5                       | 3 | 182 | 0.720 | 126 | 0.565 |
| NAU1052    | (AGT)6                        | 2 | 87  | 0.775 | 129 | 0.167 |
| SWU10037   | (GAA)9                        | 3 | 179 | 0.773 | 129 | 0.529 |
| SWU10072   | (CT)14                        | 2 | 154 | 0.678 | 129 | 0.455 |
| SWU10113   | (TATG)11                      | 3 | 117 | 0.698 | 129 | 0.652 |
| SWU10116   | (GGAGAG)4                     | 3 | 197 | 0.558 | 128 | 0.662 |
| SWU10326   | (AC)15                        | 2 | 164 | 0.828 | 131 | 0.363 |
| SWU10332   | (TTC)10                       | 6 | 111 | 0.857 | 129 | 0.716 |
| SWU10608   | (TTC)11                       | 4 | 171 | 0.674 | 131 | 0.716 |
| SWU10663   | (ATT)14                       | 3 | 114 | 0.710 | 131 | 0.533 |
| SWU10664   | (TTA)13                       | 2 | 107 | 0.599 | 126 | 0.473 |
| SWU10718   | (TTTTA)5                      | 2 | 93  | 0.631 | 126 | 0.458 |
| SWU10722   | (TGTA)17                      | 3 | 126 | 0.677 | 127 | 0.569 |
| SWU10741   | (AACA)5                       | 3 | 136 | 0.760 | 129 | 0.533 |
| SWU10746   | (ACC)8                        | 2 | 190 | 0.736 | 129 | 0.500 |
| SWU10755   | (TAGA)5                       | 2 | 98  | 0.798 | 131 | 0.183 |
| SWU10828   | (ATGT)6                       | 3 | 184 | 0.584 | 129 | 0.654 |
| SWU10840   | (TGA)10                       | 3 | 66  | 0.829 | 129 | 0.506 |
| SWU10892   | (TTA)13                       | 3 | 141 | 0.686 | 123 | 0.541 |
| SWU10931   | (GCAATG)4                     | 2 | 212 | 0.828 | 128 | 0.499 |
| SWU11097   | (ATACAT)7                     | 3 | 190 | 0.788 | 126 | 0.537 |
| SWU11112   | (CA)18-(TCTATA)7              | 3 | 249 | 0.747 | 128 | 0.631 |
| SWU11115   | (TGA)10                       | 3 | 189 | 0.541 | 130 | 0.664 |
| SWU11731   | (GTT)7                        | 3 | 194 | 0.690 | 131 | 0.604 |
| SWU12187   | (TGC)6                        | 3 | 132 | 0.656 | 128 | 0.587 |
| SWU12228   | (AAAGAG)4                     | 2 | 89  | 0.652 | 128 | 0.482 |
| SWU12248   | (TTC)17                       | 2 | 71  | 0.723 | 128 | 0.499 |
| SWU12430   | (CATGCT)4                     | 3 | 110 | 0.730 | 127 | 0.513 |
| SWU12746   | (GGA)10                       | 2 | 93  | 0.746 | 124 | 0.285 |
| SWU13423   | (TC)14                        | 2 | 126 | 0.656 | 127 | 0.450 |
| SWU13534   | (AGACA)4                      | 2 | 139 | 0.707 | 128 | 0.427 |
| SWU13551   | (CCTAC)4                      | 3 | 174 | 0.578 | 128 | 0.654 |
| SWU13677   | (AATGAG)6                     | 4 | 170 | 0.708 | 132 | 0.650 |
| SWU13893   | (CATA)9                       | 4 | 204 | 0.621 | 132 | 0.731 |
| SWU13895   | (ATAC)8                       | 4 | 122 | 0.767 | 131 | 0.675 |
| SWU14260   | (GAT)17                       | 4 | 88  | 0.827 | 127 | 0.572 |
| SWU14461   | (TTC)15                       | 3 | 125 | 0.669 | 118 | 0.549 |

|               |                |              |               |              |                |              |
|---------------|----------------|--------------|---------------|--------------|----------------|--------------|
| SWU14590      | (CT)10         | 3            | 207           | 0.831        | 132            | 0.523        |
| SWU14654      | (GGAATA)5      | 3            | 164           | 0.672        | 132            | 0.620        |
| SWU14702      | (TA)12         | 2            | 196           | 0.784        | 125            | 0.495        |
| SWU14818      | (CAG)8         | 3            | 112           | 0.889        | 132            | 0.197        |
| SWU14961      | (TTGGCA)5      | 4            | 109           | 0.784        | 124            | 0.542        |
| SWU15000      | (TG)12         | 4            | 289           | 0.778        | 132            | 0.673        |
| SWU15194      | (ACAT)14       | 7            | 200           | 0.830        | 132            | 0.726        |
| SWU15212      | (CATA)6        | 3            | 222           | 0.886        | 128            | 0.522        |
| SWU15473      | (GAA)11        | 4            | 197           | 0.725        | 128            | 0.652        |
| SWU15517      | (ATAC)7        | 5            | 131           | 0.798        | 130            | 0.698        |
| SWU15642      | (AGTAT)6       | 5            | 173           | 0.738        | 132            | 0.773        |
| SWU16339      | (CT)10         | 3            | 222           | 0.569        | 130            | 0.661        |
| SWU16373      | (TG)10         | 4            | 169           | 0.680        | 132            | 0.706        |
| SWU16441      | (CAT)7         | 4            | 156           | 0.814        | 132            | 0.561        |
| SWU16671      | (TA)18         | 4            | 173           | 0.787        | 128            | 0.564        |
| SWU16802      | (GAA)7-(GAA)16 | 5            | 125           | 0.856        | 124            | 0.552        |
| SWU18196      | (GTTTG)6       | 5            | 248           | 0.689        | 131            | 0.739        |
| SWU18252      | (CAA)8         | 3            | 124           | 0.959        | 130            | 0.078        |
| SWU18262      | (ATATGT)8      | 5            | 128           | 0.802        | 129            | 0.725        |
| SWU18289      | (ACAT)6-(AT)12 | 5            | 136           | 0.784        | 126            | 0.700        |
| <b>G Mean</b> |                | <b>3.441</b> | <b>161.73</b> | <b>0.738</b> | <b>128.432</b> | <b>0.555</b> |
