# Supplementary material for: Assessment of Genetic Diversity, Population Structure, and Evolutionary Relationship of Uncharacterized Genes in a Novel Germplasm Collection of Diploid and Allotetraploid Gossypium Accessions Using EST and Genomic SSR Markers
Source: MDPI journal article supplement (doi:10.3390/ijms19082401), 2018-08-14
Supplement: s1 [file s1]

Supplementary Table S4: Proportional Membership of cotton accessions to clusters as determined by model based analysis using STRUCTURE. Lines were assigned to a group based on membership probability higher than 0.70. The identified cluster roughly correspond to following geographical areas of cotton belt: Cluster 1-Santa Cruz (D3), cluster 2-Hawaiian, cluster 3-Isabella, cluster 4-Dominican Republic, cluster 5-San Cristobal and cluster 6-Santa Cruz (*G. barbadense*).

| Sr. No. | Accession Name  | Cluster 1 | Cluster 2 | Cluster 3 | Cluster 4 | Cluster 5 | Cluster 6 | Group |
|---------|-----------------|-----------|-----------|-----------|-----------|-----------|-----------|-------|
| 1       | 3-79-2          | 0.000     | 0.000     | 0.000     | 0.000     | 0.000     | 0.998     | GP6   |
| 2       | 3-79-3          | 0.000     | 0.000     | 0.001     | 0.000     | 0.002     | 0.996     | GP6   |
| 3       | AD2-1-1 GLPS    | 0.000     | 0.000     | 0.000     | 0.000     | 0.000     | 0.999     | GP6   |
| 4       | AD2-1-2 GLPS    | 0.000     | 0.000     | 0.000     | 0.000     | 0.000     | 0.999     | GP6   |
| 5       | AD2-1-3 GLPS    | 0.000     | 0.000     | 0.000     | 0.000     | 0.000     | 0.999     | GP6   |
| 6       | AD2-1-4 GLPS    | 0.000     | 0.000     | 0.000     | 0.000     | 0.000     | 0.999     | GP6   |
| 7       | AD2-1-5 GLPS    | 0.001     | 0.000     | 0.000     | 0.001     | 0.000     | 0.998     | GP6   |
| 8       | AD2-6           | 0.001     | 0.031     | 0.001     | 0.001     | 0.337     | 0.629     | GP6   |
| 9       | AD2-2 GLPS      | 0.000     | 0.000     | 0.001     | 0.001     | 0.034     | 0.964     | GP6   |
| 10      | AD2-3-1 GLPS    | 0.000     | 0.000     | 0.001     | 0.000     | 0.003     | 0.996     | GP6   |
| 11      | AD2-3-2 GLPS    | 0.000     | 0.000     | 0.000     | 0.000     | 0.000     | 0.999     | GP6   |
| 12      | AD2-4-1 GLPS    | 0.000     | 0.000     | 0.000     | 0.000     | 0.000     | 0.999     | GP6   |
| 13      | AD2-4-2 GLPS    | 0.000     | 0.000     | 0.000     | 0.000     | 0.000     | 0.999     | GP6   |
| 14      | AD2-5-1 GLPS    | 0.000     | 0.000     | 0.002     | 0.000     | 0.001     | 0.996     | GP6   |
| 15      | AD2-5-2GLPS     | 0.000     | 0.000     | 0.000     | 0.000     | 0.000     | 0.998     | GP6   |
| 16      | AD2-5-3 GLPS    | 0.001     | 0.000     | 0.001     | 0.001     | 0.002     | 0.996     | GP6   |
| 17      | AD2-5-4 GLPS    | 0.001     | 0.000     | 0.186     | 0.000     | 0.002     | 0.811     | GP6   |
| 18      | XH-18           | 0.001     | 0.110     | 0.104     | 0.001     | 0.229     | 0.554     | Mixed |
| 19      | XH-21           | 0.011     | 0.142     | 0.135     | 0.002     | 0.242     | 0.468     | Mixed |
| 20      | Sibruk Egyptian | 0.001     | 0.121     | 0.002     | 0.001     | 0.269     | 0.606     | Mixed |
| 21      | AD5-lz          | 0.009     | 0.000     | 0.674     | 0.071     | 0.001     | 0.243     | Mixed |
| 22      | AD5-3           | 0.097     | 0.004     | 0.805     | 0.014     | 0.010     | 0.070     | GP3   |
| 23      | AD5-7           | 0.035     | 0.000     | 0.624     | 0.008     | 0.121     | 0.211     | Mixed |
| 24      | AD5-25-1        | 0.000     | 0.001     | 0.492     | 0.000     | 0.418     | 0.088     | Mixed |
| 25      | AD5-26-1        | 0.001     | 0.001     | 0.629     | 0.000     | 0.120     | 0.247     | Mixed |
| 26      | AD5-26-2        | 0.002     | 0.001     | 0.647     | 0.000     | 0.113     | 0.236     | Mixed |
| 27      | AD5-28-1        | 0.000     | 0.000     | 0.998     | 0.000     | 0.001     | 0.000     | GP3   |
| 28      | AD5-28-2        | 0.000     | 0.000     | 0.999     | 0.000     | 0.000     | 0.000     | GP3   |
| 29      | AD5-28-3        | 0.000     | 0.000     | 0.998     | 0.000     | 0.000     | 0.000     | GP3   |
| 30      | AD5-28-4        | 0.000     | 0.000     | 0.999     | 0.000     | 0.000     | 0.000     | GP3   |
| 31      | AD5-29-1        | 0.001     | 0.000     | 0.996     | 0.000     | 0.001     | 0.002     | GP3   |
| 32      | AD5-29-2        | 0.000     | 0.001     | 0.983     | 0.001     | 0.015     | 0.000     | GP3   |
| 33      | AD5-30-1        | 0.000     | 0.000     | 0.999     | 0.000     | 0.000     | 0.000     | GP3   |
| 34      | AD5-30-2        | 0.000     | 0.000     | 0.999     | 0.000     | 0.000     | 0.000     | GP3   |
| 35      | AD5-30-3        | 0.000     | 0.000     | 0.999     | 0.000     | 0.000     | 0.000     | GP3   |

|    |                    |       |       |       |       |       |       |       |
|----|--------------------|-------|-------|-------|-------|-------|-------|-------|
| 36 | AD5-30-4           | 0.001 | 0.000 | 0.997 | 0.000 | 0.001 | 0.000 | GP3   |
| 37 | AD5-31-1           | 0.002 | 0.001 | 0.994 | 0.000 | 0.002 | 0.001 | GP3   |
| 38 | AD5-31-2           | 0.001 | 0.000 | 0.997 | 0.001 | 0.001 | 0.001 | GP3   |
| 39 | AD5-31-3           | 0.001 | 0.000 | 0.947 | 0.001 | 0.049 | 0.002 | GP3   |
| 40 | AD5-43             | 0.036 | 0.001 | 0.515 | 0.005 | 0.443 | 0.001 | Mixed |
| 41 | AD5-48             | 0.000 | 0.000 | 0.611 | 0.020 | 0.367 | 0.002 | Mixed |
| 42 | AD5-50             | 0.001 | 0.001 | 0.634 | 0.001 | 0.362 | 0.000 | Mixed |
| 43 | AD5-51             | 0.003 | 0.001 | 0.578 | 0.001 | 0.416 | 0.001 | Mixed |
| 44 | AD5-52             | 0.000 | 0.000 | 0.570 | 0.000 | 0.429 | 0.000 | Mixed |
| 45 | AD5-53             | 0.000 | 0.000 | 0.490 | 0.000 | 0.508 | 0.001 | Mixed |
| 46 | AD5-54-1           | 0.053 | 0.073 | 0.001 | 0.002 | 0.843 | 0.028 | GP5   |
| 47 | AD5-54-2           | 0.001 | 0.001 | 0.007 | 0.049 | 0.937 | 0.006 | GP5   |
| 48 | AD5-55             | 0.002 | 0.000 | 0.002 | 0.001 | 0.827 | 0.168 | GP5   |
| 49 | AD5-22             | 0.002 | 0.000 | 0.532 | 0.001 | 0.328 | 0.137 | Mixed |
| 50 | AD5-24             | 0.017 | 0.001 | 0.556 | 0.010 | 0.383 | 0.033 | Mixed |
| 51 | AD5-25-2           | 0.000 | 0.001 | 0.487 | 0.000 | 0.456 | 0.055 | Mixed |
| 52 | AD5-32             | 0.002 | 0.002 | 0.373 | 0.001 | 0.265 | 0.356 | Mixed |
| 53 | AD5-32-1           | 0.002 | 0.002 | 0.374 | 0.001 | 0.267 | 0.353 | Mixed |
| 54 | AD5-33             | 0.001 | 0.001 | 0.415 | 0.000 | 0.464 | 0.119 | Mixed |
| 55 | AD5-34-1           | 0.000 | 0.000 | 0.681 | 0.000 | 0.317 | 0.002 | Mixed |
| 56 | AD5-34-2           | 0.001 | 0.001 | 0.695 | 0.000 | 0.291 | 0.012 | Mixed |
| 57 | AD5-34-3           | 0.000 | 0.002 | 0.669 | 0.001 | 0.228 | 0.100 | Mixed |
| 58 | AD5-34-4           | 0.000 | 0.001 | 0.626 | 0.000 | 0.240 | 0.132 | Mixed |
| 59 | AD5-34-5           | 0.003 | 0.014 | 0.415 | 0.001 | 0.477 | 0.089 | Mixed |
| 60 | AD5-35-1           | 0.001 | 0.001 | 0.463 | 0.001 | 0.315 | 0.220 | Mixed |
| 61 | AD5-35-2           | 0.004 | 0.001 | 0.469 | 0.001 | 0.306 | 0.220 | Mixed |
| 62 | AD5-56             | 0.000 | 0.015 | 0.002 | 0.040 | 0.940 | 0.003 | GP5   |
| 63 | AD5-57             | 0.104 | 0.003 | 0.006 | 0.000 | 0.885 | 0.001 | GP5   |
| 64 | AD5-58             | 0.001 | 0.000 | 0.065 | 0.003 | 0.931 | 0.001 | GP5   |
| 65 | AD5-59-1           | 0.000 | 0.000 | 0.000 | 0.000 | 0.999 | 0.000 | GP5   |
| 66 | AD5-59-2           | 0.001 | 0.001 | 0.001 | 0.000 | 0.998 | 0.000 | GP5   |
| 67 | AD5-60             | 0.000 | 0.000 | 0.000 | 0.000 | 0.999 | 0.000 | GP5   |
| 68 | AD5-61-1           | 0.000 | 0.000 | 0.000 | 0.000 | 0.998 | 0.001 | GP5   |
| 69 | AD5-61-2           | 0.000 | 0.000 | 0.001 | 0.000 | 0.998 | 0.000 | GP5   |
| 70 | AD5-61-3           | 0.000 | 0.000 | 0.000 | 0.000 | 0.999 | 0.000 | GP5   |
| 71 | AD5-61-4           | 0.000 | 0.000 | 0.000 | 0.000 | 0.999 | 0.000 | GP5   |
| 72 | AD5-61-5           | 0.000 | 0.000 | 0.000 | 0.000 | 0.999 | 0.000 | GP5   |
| 73 | AD5-61-6           | 0.026 | 0.000 | 0.004 | 0.000 | 0.968 | 0.001 | GP5   |
| 74 | AD5-61-7           | 0.000 | 0.009 | 0.001 | 0.004 | 0.982 | 0.004 | GP5   |
| 75 | AD5-61-8           | 0.000 | 0.000 | 0.000 | 0.000 | 0.999 | 0.000 | GP5   |
| 76 | AD5-61-9           | 0.016 | 0.000 | 0.000 | 0.001 | 0.983 | 0.000 | GP5   |
| 77 | AD5-61-10          | 0.000 | 0.002 | 0.001 | 0.000 | 0.995 | 0.002 | GP5   |
| 78 | Subsp.darwini II-1 | 0.001 | 0.002 | 0.655 | 0.002 | 0.006 | 0.334 | Mixed |
| 79 | Subsp.darwini II-2 | 0.001 | 0.019 | 0.596 | 0.001 | 0.096 | 0.288 | Mixed |
| 80 | D3k-lz             | 0.998 | 0.001 | 0.001 | 0.000 | 0.000 | 0.000 | GP1   |
| 81 | D3k-21-1           | 0.999 | 0.000 | 0.000 | 0.000 | 0.000 | 0.000 | GP1   |
| 82 | D3k-21-2           | 0.999 | 0.000 | 0.000 | 0.000 | 0.000 | 0.000 | GP1   |
| 83 | D3k-21-3           | 0.999 | 0.000 | 0.000 | 0.000 | 0.000 | 0.000 | GP1   |

|     |           |       |       |       |       |       |       |       |
|-----|-----------|-------|-------|-------|-------|-------|-------|-------|
| 84  | D3k-21-4  | 0.999 | 0.000 | 0.000 | 0.000 | 0.000 | 0.000 | GP1   |
| 85  | CCRI12    | 0.111 | 0.278 | 0.010 | 0.472 | 0.011 | 0.117 | Mixed |
| 86  | CCRI16    | 0.122 | 0.245 | 0.001 | 0.507 | 0.026 | 0.097 | Mixed |
| 87  | AD3-27    | 0.002 | 0.874 | 0.001 | 0.025 | 0.098 | 0.000 | GP2   |
| 88  | AD3-28-1  | 0.004 | 0.989 | 0.000 | 0.001 | 0.006 | 0.000 | GP2   |
| 89  | AD3-28-2  | 0.000 | 0.998 | 0.000 | 0.000 | 0.001 | 0.000 | GP2   |
| 90  | AD3-30-1  | 0.000 | 0.999 | 0.000 | 0.000 | 0.000 | 0.000 | GP2   |
| 91  | AD3-30-2  | 0.000 | 0.999 | 0.000 | 0.000 | 0.000 | 0.000 | GP2   |
| 92  | AD3-lz    | 0.000 | 0.999 | 0.000 | 0.000 | 0.000 | 0.000 | GP2   |
| 93  | AD3-70    | 0.001 | 0.998 | 0.000 | 0.000 | 0.000 | 0.000 | GP2   |
| 94  | AD3-71    | 0.000 | 0.999 | 0.000 | 0.000 | 0.000 | 0.000 | GP2   |
| 95  | AD3-72    | 0.000 | 0.999 | 0.000 | 0.000 | 0.000 | 0.000 | GP2   |
| 96  | AD3-73    | 0.000 | 0.999 | 0.000 | 0.000 | 0.000 | 0.000 | GP2   |
| 97  | AD3-68    | 0.001 | 0.997 | 0.001 | 0.000 | 0.001 | 0.000 | GP2   |
| 98  | AD3-69    | 0.000 | 0.995 | 0.002 | 0.001 | 0.001 | 0.001 | GP2   |
| 99  | AD3-21    | 0.000 | 0.999 | 0.000 | 0.000 | 0.000 | 0.000 | GP2   |
| 100 | AD3-23    | 0.000 | 0.999 | 0.000 | 0.000 | 0.000 | 0.000 | GP2   |
| 101 | AD3-24    | 0.000 | 0.999 | 0.000 | 0.000 | 0.000 | 0.000 | GP2   |
| 102 | AD3-25    | 0.000 | 0.999 | 0.000 | 0.000 | 0.000 | 0.000 | GP2   |
| 103 | AD3-26    | 0.000 | 0.999 | 0.000 | 0.000 | 0.000 | 0.000 | GP2   |
| 104 | AD3-32    | 0.000 | 0.999 | 0.000 | 0.000 | 0.000 | 0.000 | GP2   |
| 105 | AD3-33    | 0.000 | 0.999 | 0.000 | 0.000 | 0.000 | 0.000 | GP2   |
| 106 | AD3-35    | 0.000 | 0.999 | 0.000 | 0.000 | 0.000 | 0.000 | GP2   |
| 107 | AD3-36    | 0.000 | 0.999 | 0.000 | 0.000 | 0.000 | 0.000 | GP2   |
| 108 | AD3-37    | 0.017 | 0.981 | 0.001 | 0.000 | 0.001 | 0.000 | GP2   |
| 109 | AD3-38    | 0.000 | 0.998 | 0.000 | 0.000 | 0.000 | 0.000 | GP2   |
| 110 | AD3-39    | 0.000 | 0.999 | 0.000 | 0.000 | 0.000 | 0.000 | GP2   |
| 111 | AD3-40    | 0.010 | 0.987 | 0.000 | 0.001 | 0.001 | 0.000 | GP2   |
| 112 | AD3-41    | 0.000 | 0.999 | 0.000 | 0.000 | 0.000 | 0.000 | GP2   |
| 113 | AD3-42    | 0.000 | 0.998 | 0.000 | 0.001 | 0.000 | 0.001 | GP2   |
| 114 | AD3-45    | 0.000 | 0.999 | 0.000 | 0.000 | 0.000 | 0.000 | GP2   |
| 115 | AD3-46    | 0.000 | 0.999 | 0.000 | 0.000 | 0.000 | 0.000 | GP2   |
| 116 | AD3-47    | 0.001 | 0.998 | 0.000 | 0.000 | 0.000 | 0.000 | GP2   |
| 117 | AD3-49    | 0.001 | 0.996 | 0.000 | 0.002 | 0.000 | 0.000 | GP2   |
| 118 | AD3-50    | 0.006 | 0.964 | 0.005 | 0.023 | 0.001 | 0.000 | GP2   |
| 119 | AD6-01-1  | 0.002 | 0.000 | 0.000 | 0.997 | 0.000 | 0.000 | GP4   |
| 120 | AD6-01-2  | 0.000 | 0.000 | 0.000 | 0.999 | 0.000 | 0.000 | GP4   |
| 121 | AD6-01-3  | 0.000 | 0.000 | 0.000 | 0.999 | 0.000 | 0.000 | GP4   |
| 122 | AD6-02-4  | 0.002 | 0.002 | 0.000 | 0.994 | 0.001 | 0.001 | GP4   |
| 123 | AD6-03-7  | 0.000 | 0.000 | 0.000 | 0.999 | 0.000 | 0.000 | GP4   |
| 124 | AD6-03-8  | 0.000 | 0.000 | 0.000 | 0.999 | 0.000 | 0.000 | GP4   |
| 125 | AD6-03-9  | 0.000 | 0.000 | 0.000 | 0.999 | 0.000 | 0.000 | GP4   |
| 126 | AD6-03-10 | 0.000 | 0.001 | 0.000 | 0.998 | 0.000 | 0.000 | GP4   |
| 127 | AD6-03-11 | 0.000 | 0.000 | 0.000 | 0.999 | 0.000 | 0.000 | GP4   |
| 128 | AD6-03-12 | 0.000 | 0.061 | 0.001 | 0.871 | 0.066 | 0.000 | GP4   |
| 129 | AD7-01-13 | 0.001 | 0.344 | 0.002 | 0.651 | 0.001 | 0.001 | Mixed |
| 130 | AD7-01-14 | 0.002 | 0.337 | 0.002 | 0.656 | 0.002 | 0.001 | Mixed |
| 131 | AD7-01-15 | 0.002 | 0.321 | 0.002 | 0.673 | 0.002 | 0.001 | Mixed |

|     |           |       |       |       |       |       |       |       |
|-----|-----------|-------|-------|-------|-------|-------|-------|-------|
| 132 | AD7-01-16 | 0.001 | 0.336 | 0.002 | 0.658 | 0.002 | 0.001 | Mixed |
|-----|-----------|-------|-------|-------|-------|-------|-------|-------|
