# Supplementary figures and images for: Assessment of Genetic Diversity, Population Structure, and Evolutionary Relationship of Uncharacterized Genes in a Novel Germplasm Collection of Diploid and Allotetraploid Gossypium Accessions Using EST and Genomic SSR Markers
Source: MDPI journal article supplement (doi:10.3390/ijms19082401), 2018-08-14

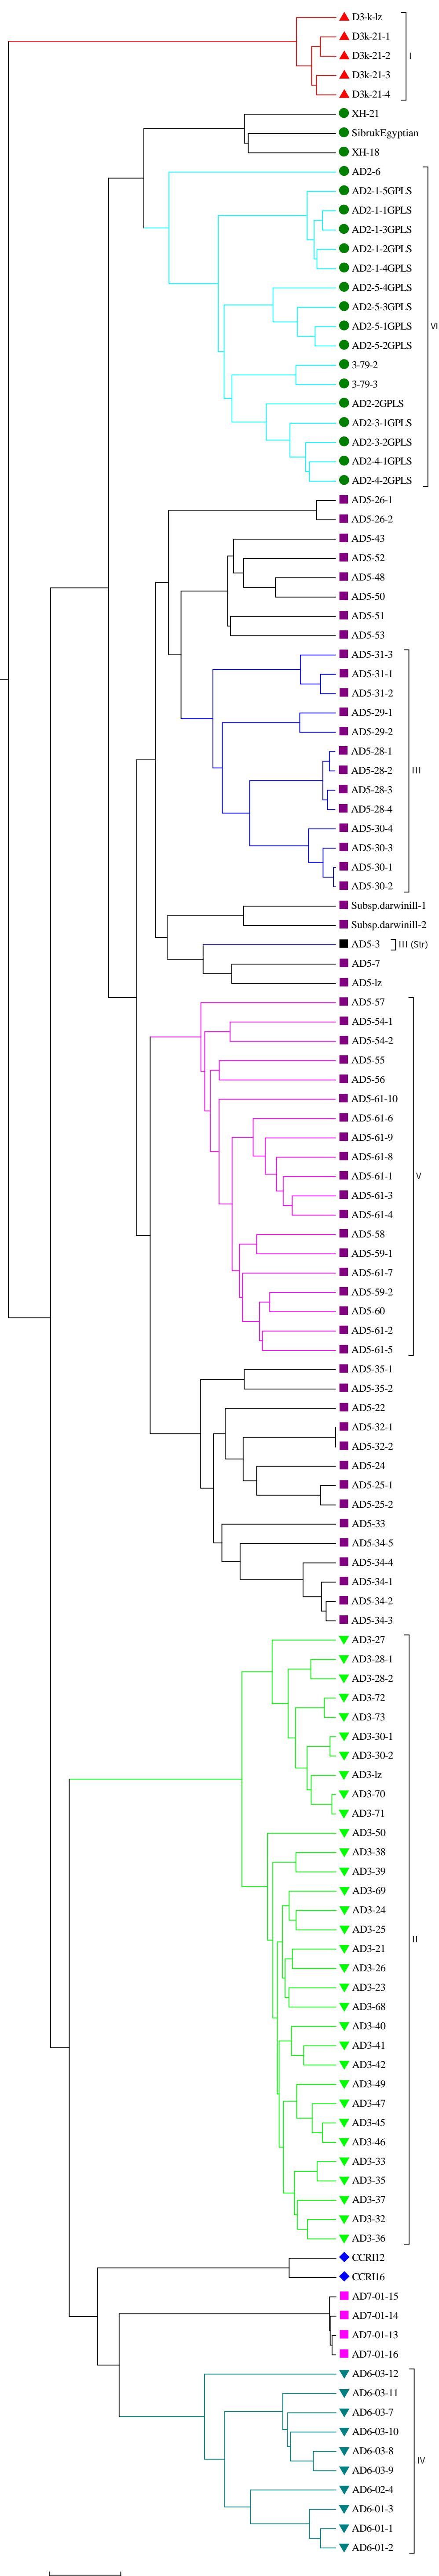

Supplement: s1 [file s1]
